# Supplementary material
Source: publisher figshare collection journal article supplement (https://gsapubs.figshare.com/ndownloader/files/23306654)
Supplement: Supplementary file 1 [file 23306654]

## Sheet: dinocysts
		Spiniferites ramosus																Areoligera volata								Apectodinium spp								Eocladopyxis							Amorphous organic matter
sample code	depth	average	stdev	count	std.error	area Vs	area stdev	stdev of PE within same area interval (grey lines in histograms)										average	stdev	count	std.error	area Vs	area stdev	stdev of PE		average	stdev	count	std.error	area Vs	area stdev	stdev of PE		average	stdev	count	std.error	area Vs	area stdev	stdev of PE	average	stdev	count	std.error	area Vs	area stdev	stdev of PE
BR41	352.821	-26.7413	2.05051	29	0.38077	0.801379	0.740206	1.49																		-25.8372	1.75632	41	0.274292	0.454195	0.265595	1.6
BR67	356.448	-26.9083	1.61339	35	0.272713	0.707514	0.405361	1.48																										-24.8144	1.67363	35	0.282896	0.672714	0.344626	1.59
BR71	356.845	-26.7595	1.88729	25	0.377457	0.5978	0.388503	1.53										-25.8895	1.26042	43	0.192213	0.663535	0.291364	1.63		-27.0532	1.66867	52	0.231403	0.624231	0.295583	1.48
BR74	357.119	-27.1223	1.26337	17	0.306412	0.511941	0.248013	1.76																		-27.3479	2.33394	48	0.336876	0.53325	0.309864	1.71									-30.4734	1.63988	24	0.334738	0.882917	0.553256	1.51
BR80	357.576	-24.8703	1.73762	49	0.248232	0.700796	0.401145	1.57										-24.157	2.25043	45	0.335474	0.822667	0.371463	1.42		-23.3962	2.78481	40	0.440317	0.495125	0.204387	1.86
BR83	357.85	-25.7795	1.6794	29	0.311856	0.705828	0.316988	1.45
BR95	359.405	-23.7995	1.85961	14	0.497003	0.692214	0.292382	1.57										-21.1905	2.53598	70	0.303108	0.714429	0.29735	1.57
BR121	364.891	-24.492	1.77032	23	0.369138	0.566696	0.333953	1.66										-23.2074	2.4539	44	0.369939	0.541841	0.213245	1.81
	average	0.801379	-26.7413	0.707514	-26.9083	0.5978	-26.7595	0.511941	-27.1223	0.700796	-24.8703	0.705828	-25.7795	0.692214	-23.7995	0.566696	-24.492	0.663535	-25.8895	0.822667	-24.157	0.714429	-21.1905	0.541841	-23.2074	0.454195	-25.8372	0.624231	-27.0532	0.53325	-27.3479	0.495125	-23.3962	0.672714	-24.8144						0.882917	-30.4734
	median	0.615	-26.4872	0.577	-26.7785	0.499	-26.6655	0.473	-27.3407	0.559	-24.5927	0.582	-25.8238	0.62	-23.5046	0.428	-24.265	0.604	-25.8544	0.751	-23.8838	0.657	-21.0783	0.484	-22.7759	0.369	-26.0234	0.6075	-27.0741	0.4275	-27.1598	0.476	-23.26	0.654	-24.366						0.694	-30.3959
	stdev	0.740206	2.05051	0.405361	1.61339	0.388503	1.88729	0.248013	1.26337	0.401145	1.73762	0.316988	1.6794	0.292382	1.85961	0.333953	1.77032	0.291364	1.26042	0.371463	2.25043	0.29735	2.53598	0.213245	2.4539	0.265595	1.75632	0.295583	1.66867	0.309864	2.33394	0.204387	2.78481	0.344626	1.67363						0.553256	1.63988
	count	29	29	35	35	25	25	17	17	49	49	29	29	14	14	23	23	43	43	45	45	70	70	44	44	41	41	52	52	48	48	40	40	35	35						24	24
	SE	0.137453	0.38077	0.0685186	0.272713	0.0777005	0.377457	0.0601519	0.306412	0.0573064	0.248232	0.0588632	0.311856	0.0781424	0.497003	0.069634	0.369138	0.0444326	0.192213	0.0553744	0.335474	0.0355402	0.303108	0.0321479	0.369939	0.041479	0.274292	0.0409901	0.231403	0.0447251	0.336876	0.0323165	0.440317	0.0582525	0.282896						0.112933	0.334738
		Area	d13C	Area	d13C	Area	d13C	Area	d13C	Area	d13C	Area	d13C	Area	d13C	Area	d13C	Area	d13C	Area	d13C	Area	d13C	Area	d13C	Area	d13C	Area	d13C	Area	d13C	Area	d13C	Area	d13C						Area	d13C
		BR41.Sp.area	BR41.Sp	BR67.Sp.area	BR67.Sp	BR71.Sp.area	BR71.Sp	BR74.Sp.area	BR74.Sp	BR80.Sp.area	BR80.Sp	BR83.Sp.area	BR83.Sp	BR95.Sp.area	BR95.Sp	BR121.Sp.area	BR121.Sp	BR71.Areo.area	BR71.Areo	BR80.Areo.area	BR80.Areo	BR95.Areo.area	BR95.Areo	BR121.Areo.area	BR121.Areo	BR41.Apecto.area	BR41.Apecto	BR71.Apecto.area	BR71.Apecto	BR74.Apecto.area	BR74.Apecto	BR80.Apecto.area	BR80.Apecto	BR67.Eocl.area	BR67.Eocl						BR74.AOM.area	BR74.AOM
		0.08	-24.0112	0.25	-30.1335	0.182	-30.1562	0.218	-27.9853	0.171	-24.5927	0.331	-27.7062	0.271	-22.9043	0.211	-27.3652	0.186	-26.357	0.23	-27.3802	0.203	-14.0618	0.241	-28.6933	0.186	-27.6946	0.269	-27.5942	0.105	-33.902	0.189	-24.409	0.188	-24.1306						0.304	-31.996
		0.137	-28.1302	0.251	-23.1678	0.193	-29.6778	0.218	-27.4797	0.213	-21.0628	0.382	-26.234	0.405	-24.7226	0.215	-26.783	0.19	-26.0988	0.276	-22.9836	0.225	-23.6088	0.26	-26.4424	0.21	-28.2358	0.276	-30.5834	0.133	-28.375	0.189	-29.584	0.222	-23.8832						0.355	-32.7236
		0.177	-29.3896	0.268	-27.5265	0.26	-27.0888	0.236	-25.5837	0.22	-23.6747	0.414	-26.4212	0.495	-23.6236	0.265	-25.2102	0.238	-25.3902	0.31	-25.1382	0.32	-23.3368	0.291	-24.366	0.217	-24.7704	0.294	-27.7064	0.187	-26.591	0.224	-21.8536	0.234	-27.1322						0.376	-33.056
		0.207	-28.7676	0.27	-29.9295	0.272	-25.7065	0.35	-28.4792	0.23	-24.6666	0.419	-23.8765	0.519	-21.461	0.287	-24.265	0.246	-26.0658	0.447	-27.0194	0.335	-27.3748	0.291	-25.1908	0.225	-26.9134	0.308	-29.221	0.254	-27.87	0.232	-25.046	0.254	-27.7146						0.388	-31.786
		0.265	-22.2028	0.28	-30.0785	0.294	-27.2398	0.352	-26.7302	0.271	-28.7525	0.448	-27.9682	0.526	-25.636	0.299	-27.0518	0.356	-26.0812	0.479	-25.2738	0.363	-24.291	0.298	-24.5384	0.227	-27.787	0.319	-27.7224	0.27	-26.1946	0.241	-25.0798	0.274	-27.319						0.424	-32.1536
		0.296	-30.86	0.303	-24.9525	0.311	-24.4078	0.354	-29.9772	0.28	-26.0148	0.452	-29.0075	0.549	-24.134	0.306	-27.729	0.365	-26.042	0.521	-24.0518	0.381	-16.5228	0.307	-27.1124	0.236	-26.7148	0.322	-30.3474	0.271	-27.239	0.245	-23.81	0.28	-22.864						0.493	-30.166
		0.3	-29.3776	0.336	-27.3722	0.337	-26.0325	0.364	-26.8803	0.309	-24.3045	0.46	-24.1378	0.552	-27.5663	0.317	-21.1632	0.397	-23.195	0.523	-25.3638	0.389	-22.9812	0.333	-23.3108	0.239	-28.3895	0.332	-26.89	0.275	-27.5726	0.289	-31.4138	0.286	-21.4996						0.495	-29.7166
		0.332	-25.3096	0.342	-26.7785	0.366	-31.2874	0.473	-27.5628	0.324	-24.5484	0.485	-25.735	0.688	-23.3856	0.344	-24.6568	0.414	-27.127	0.549	-25.5386	0.389	-21.4983	0.347	-23.8324	0.264	-26.1575	0.349	-27.973	0.298	-24.855	0.316	-22.75	0.32	-23.1272						0.497	-30.509
		0.385	-25.8556	0.388	-27.167	0.371	-22.4478	0.505	-27.3433	0.339	-28.1338	0.528	-27.0815	0.694	-21.9962	0.345	-24.5082	0.422	-23.9436	0.583	-21.7313	0.406	-23.8332	0.35	-22.7053	0.275	-21.764	0.355	-26.5066	0.299	-30.258	0.325	-18.7826	0.343	-24.287						0.56	-28.8758
		0.407	-25.7702	0.409	-25.8618	0.421	-26.9062	0.536	-27.3407	0.35	-23.9268	0.532	-26.4672	0.742	-25.8102	0.369	-25.5188	0.446	-24.26	0.593	-27.7428	0.418	-20.6264	0.363	-21.5495	0.281	-25.9776	0.358	-28.995	0.319	-24.6018	0.341	-21.106	0.381	-26.6804						0.624	-31.847
		0.426	-28.6008	0.464	-26.399	0.451	-26.5562	0.536	-27.3102	0.363	-24.5228	0.544	-24.792	0.888	-22.3206	0.403	-23.9168	0.47	-24.9442	0.611	-22.7193	0.43	-19.6758	0.38	-20.171	0.289	-27.999	0.372	-25.1657	0.333	-29.676	0.341	-24.5964	0.39	-27.9232						0.649	-29.071
		0.441	-30.5476	0.47	-29.5558	0.477	-23.3744	0.628	-27.4318	0.391	-28.4758	0.555	-25.8238	0.937	-21.6036	0.428	-21.495	0.509	-27.5908	0.622	-22.8094	0.445	-27.1978	0.38	-20.7335	0.297	-22.958	0.383	-27.588	0.349	-25.6662	0.351	-23.0604	0.416	-25.8962						0.668	-29.443
		0.534	-26.4872	0.477	-26.5395	0.499	-25.9363	0.629	-25.5143	0.396	-23.5994	0.567	-28.086	1.022	-22.3466	0.511	-26.7162	0.526	-25.4784	0.636	-25.8232	0.451	-21.0288	0.398	-20.4824	0.301	-26.5614	0.389	-31.3703	0.354	-30.164	0.356	-23.3284	0.511	-24.366						0.72	-32.0246
		0.539	-26.7226	0.516	-27.2278	0.515	-27.1984	0.81	-26.1928	0.423	-23.2804	0.57	-25.1562	1.403	-25.682	0.529	-24.4192	0.543	-25.5288	0.639	-28.7332	0.453	-21.1278	0.402	-22.2158	0.302	-26.8165	0.393	-28.8867	0.359	-32.2462	0.361	-22.6755	0.523	-24.2702						0.739	-31.984
		0.615	-27.0676	0.528	-24.6722	0.576	-26.7115	0.942	-28.0692	0.424	-25.935	0.582	-23.66			0.541	-23.1332	0.545	-27.429	0.652	-24.0932	0.456	-17.6788	0.407	-29.9103	0.308	-23.641	0.394	-28.223	0.372	-32.195	0.364	-23.253	0.609	-27.125						0.836	-26.1966
		0.632	-28.086	0.533	-24.4738	0.595	-27.1495	1.087	-26.7583	0.445	-27.2225	0.611	-28.3934			0.58	-22.9052	0.557	-25.3312	0.663	-23.4753	0.458	-23.997	0.427	-24.4755	0.311	-22.3328	0.401	-27.9778	0.378	-24.574	0.375	-21.1906	0.612	-24.8006						0.862	-29.1886
		0.733	-25.892	0.534	-26.1866	0.606	-26.0878	0.465	-24.4402	0.455	-22.307	0.626	-26.6705			0.682	-25.237	0.57	-25.7882	0.672	-23.1606	0.466	-19.6838	0.435	-22.8464	0.318	-25.2915	0.416	-25.6933	0.379	-28.832	0.407	-26.5334	0.634	-24.344						0.893	-29.614
		0.769	-23.9006	0.577	-27.6355	0.611	-26.4312			0.47	-24.4986	0.661	-23.3292			0.887	-22.8902	0.573	-28.5516	0.673	-27.4132	0.484	-20.6334	0.448	-22.291	0.332	-25.5615	0.481	-26.8747	0.401	-27.962	0.423	-22.94	0.654	-22.1136						0.991	-28.0468
		0.844	-23.4578	0.598	-28.9815	0.634	-28.7645			0.488	-25.7756	0.74	-23.4514			0.891	-23.9962	0.583	-26.3752	0.689	-30.1856	0.484	-21.9543	0.45	-21.823	0.335	-26.9995	0.486	-25.9226	0.402	-25.6298	0.434	-23.8675	0.686	-23.4056						1.226	-30.6426
		0.862	-26.9406	0.602	-25.7068	0.673	-26.6655			0.492	-28.7568	0.772	-27.277			1.017	-23.6982	0.587	-26.2026	0.702	-20.7598	0.492	-20.8244	0.457	-23.5614	0.355	-23.6545	0.499	-28.2592	0.403	-27.8996	0.475	-24.3796	0.724	-24.19						1.45	-29.2988
		0.875	-25.8492	0.631	-25.5335	0.92	-27.4503			0.496	-27.1048	0.773	-25.8445			1.148	-23.227	0.589	-27.4152	0.737	-23.8838	0.494	-21.5888	0.468	-22.2824	0.369	-22.8995	0.544	-24.8758	0.416	-27.136	0.477	-19.0216	0.764	-23.8242						1.564	-30.2828
		0.883	-25.9018	0.644	-27.4352	0.988	-25.7934			0.505	-26.1465	0.791	-24.1814			1.194	-23.3612	0.604	-26.549	0.743	-22.5258	0.507	-21.5324	0.473	-27.3523	0.394	-26.036	0.55	-25.6443	0.419	-24.2328	0.491	-23.4558	0.775	-24.017						1.887	-29.9218
		1.043	-28.1928	0.754	-26.3276	1.233	-26.5034			0.523	-24.8716	0.821	-23.8058			1.265	-24.0688	0.614	-24.91	0.751	-24.2292	0.508	-24.1522	0.495	-25.2828	0.416	-26.0234	0.568	-28.4574	0.422	-29.1678	0.502	-23.267	0.777	-22.2274						1.893	-31.8348
		1.097	-27.638	0.777	-28.111	1.444	-27.0353			0.527	-26.5674	0.932	-27.1325					0.622	-27.0926	0.752	-23.3016	0.534	-22.9668	0.51	-20.826	0.428	-27.8615	0.574	-27.124	0.422	-31.073	0.507	-21.5546	0.83	-26.5944						2.296	-30.982
		1.143	-27.496	0.861	-26.6335	1.716	-26.3794			0.559	-26.7345	1.034	-24.5408					0.624	-25.6012	0.775	-25.6588	0.561	-20.7526	0.542	-22.3475	0.452	-23.0028	0.584	-26.5696	0.433	-24.414	0.521	-24.4584	0.831	-24.0434
		1.268	-25.2962	1.1	-26.5936					0.644	-23.1808	1.207	-24.1664					0.648	-25.7896	0.776	-23.6736	0.576	-24.3488	0.569	-23.2994	0.476	-25.8265	0.596	-26.1513	0.44	-24.2246	0.552	-27.7695	0.869	-25.0786
		1.993	-25.5348	1.107	-27.7776					0.664	-26.6958	1.234	-23.7904					0.664	-25.7804	0.791	-21.1553	0.577	-21.6414	0.588	-25.222	0.483	-27.8906	0.619	-25.6175	0.476	-30.596	0.577	-21.2246	0.879	-27.0846
		2.523	-25.9216	1.109	-24.7552					0.695	-25.4575	1.471	-25.6488					0.676	-24.243	0.809	-25.9382	0.583	-19.7848	0.589	-22.6288	0.506	-26.21	0.621	-25.9882	0.486	-29.4086	0.587	-18.7315	0.958	-22.7164
		3.434	-26.2906	1.139	-27.045					0.696	-23.3906	1.527	-27.2208					0.69	-27.3962	0.844	-19.6398	0.592	-16.8694	0.59	-23.6443	0.52	-25.1186	0.622	-27.0516	0.489	-26.423	0.61	-24.4808	1	-24.081
				1.154	-27.2036					0.705	-23.4448							0.718	-24.195	0.849	-23.5836	0.593	-20.8748	0.6	-18.0055	0.526	-24.748	0.626	-27.0366	0.507	-27.7838	0.678	-22.937	1.029	-25.119
				1.258	-26.4776					0.716	-25.313							0.72	-26.7248	0.864	-22.8694	0.61	-22.2008	0.608	-19.524	0.545	-27.085	0.638	-30.3894	0.51	-25.813	0.719	-20.15	1.117	-25.3916
				1.283	-26.1332					0.721	-23.931							0.729	-27.7782	0.901	-24.7566	0.628	-20.9743	0.622	-25.139	0.569	-28.8564	0.646	-27.6193	0.523	-25.2042	0.72	-20.368	1.221	-24.9344
				1.288	-28.189					0.76	-23.6506							0.827	-24.3436	0.952	-22.0536	0.644	-20.2133	0.645	-24.2323	0.577	-25.657	0.649	-23.844	0.55	-27.1706	0.745	-24.8725	1.229	-24.4546
				1.459	-27.585					0.779	-24.2708							0.913	-22.856	0.959	-21.0112	0.652	-24.0928	0.665	-24.1114	0.586	-27.433	0.669	-27.206	0.551	-27.319	0.756	-26.688	1.294	-25.3966
				1.803	-25.6442					0.793	-25.0424							1.028	-26.5082	0.975	-23.2692	0.655	-20.8106	0.677	-20.419	0.609	-26.9448	0.683	-27.0776	0.601	-28.1842	0.784	-23.62	1.431	-26.47
										0.802	-25.6245							1.045	-25.2592	0.994	-22.3106	0.659	-20.4315	0.749	-19.3428	0.613	-26.3765	0.689	-27.4224	0.605	-29.1068	0.796	-28.2375
										0.957	-24.4175							1.046	-25.7134	1.002	-27.6293	0.669	-20.1628	0.753	-21.1224	0.68	-24.4154	0.701	-25.4283	0.673	-27.8932	0.797	-20.572
										1.018	-24.5538							1.061	-24.8968	1.067	-23.8128	0.672	-25.0302	0.767	-23.8328	0.703	-25.3176	0.714	-27.0705	0.697	-26.847	0.812	-21.806
										1.112	-24.5746							1.069	-27.1272	1.103	-21.0943	0.702	-21.9984	0.798	-21.8388	0.922	-25.0468	0.715	-25.3025	0.7	-23.539	0.816	-20.806
										1.123	-26.0266							1.077	-25.8544	1.181	-25.5612	0.717	-17.5205	0.867	-21.9868	1.351	-25.7256	0.788	-27.5712	0.701	-25.53	0.88	-22.1684
										1.237	-22.1786							1.22	-27.7932	1.331	-22.3734	0.722	-24.0918	0.948	-22.5208	1.389	-24.6305	0.833	-28.3208	0.775	-25.976
										1.25	-23.3538							1.298	-26.4282	1.355	-24.8718	0.74	-22.5836	0.982	-21.9498			0.838	-25.415	0.816	-24.542
										1.318	-23.3							1.327	-25.2112	1.54	-24.4358	0.793	-17.8507	1.032	-25.6744			0.843	-24.486	0.995	-26.205
										1.32	-22.631									1.613	-22.0994	0.808	-17.4133	1.039	-22.2865			0.859	-25.5172	1.011	-26.254
										1.337	-24.8195									2.286	-23.9296	0.822	-22.379					0.86	-24.1632	1.088	-24.757
										1.339	-25.5485											0.828	-21.2068					0.899	-25.9684	1.127	-27.9412
										1.493	-25.0045											0.831	-25.221					0.9	-27.473	1.464	-27.149
										1.553	-24.6128											0.838	-21.9668					0.929	-26.2814	1.558	-26.505
										1.643	-22.1466											0.863	-17.9474					0.932	-24.5714
																						0.868	-19.0557					1.007	-28.5916
																						0.871	-15.4106					1.588	-25.5865
																						0.876	-21.7677					1.78	-27.4426
																						0.901	-22.9335
																						0.906	-22.9585
																						0.907	-19.2008
																						0.907	-19.6894
																						0.953	-20.0974
																						0.971	-20.7587
																						0.972	-19.2594
																						0.975	-20.7328
																						1.036	-22.9688
																						1.065	-23.1538
																						1.087	-20.0916
																						1.15	-19.9127
																						1.193	-21.5635
																						1.222	-21.4474
																						1.24	-18.305
																						1.448	-24.1966
																						1.495	-18.3903
																						1.541	-20.8957
